# Supplementary material for: Signaling by two-component system noncognate partners promotes intrinsic tolerance to polymyxin B in uropathogenic Escherichia coli
Source: PubMed Central journal article supplement (PMC5677524; doi:10.1126/scisignal.aag1775), 2017-01-10
Supplement: NIHMS911458-supplement-Supplement.pdf [file NIHMS911458-supplement-Supplement.pdf]

## Supplementary Materials for

### **Signaling by two-component system noncognate partners promotes intrinsic tolerance to polymyxin B in uropathogenic *Escherichia coli***

Kirsten R. Guckes, Erin J. Breland, Ellisa W. Zhang, Sarah C. Hanks, Navleen K. Gill, Holly M. S. Algood, Jonathan E. Schmitz, Charles W. Stratton, Maria Hadjifrangiskou\*

\*Corresponding author. Email: maria.hadjifrangiskou@vanderbilt.edu

Published 10 January 2017, *Sci. Signal.* **10**, eaag1775 (2017)

DOI: 10.1126/scisignal.aag1775

#### **This PDF file includes:**

Fig. S1. QseC activity is not enhanced in the presence of epinephrine.

Fig. S2. The *qseBC* transcriptional surge is specific to ferric iron.

Fig. S3. PMB tolerance after ferric iron preconditioning varies between clinical urinary isolates.

Table S1. QseB and QseC protein sequence identity among *E. coli* strains and other enteric bacteria.

Table S2. Bacterial strains.

Table S3. Plasmids.

Table S4. Primers and probes.

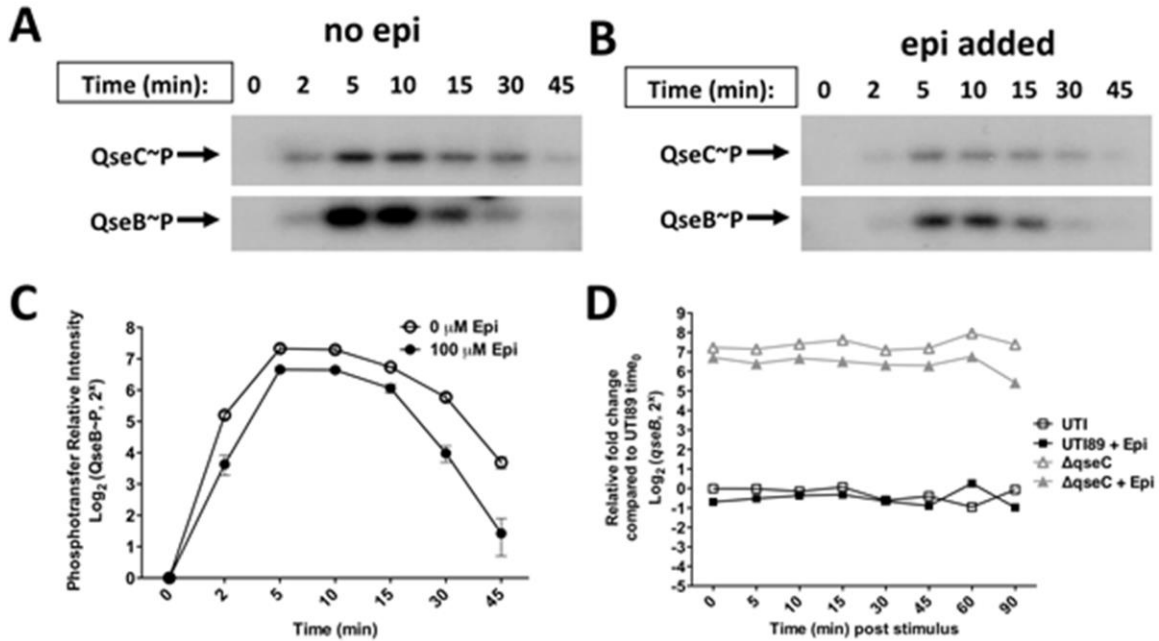

**Fig. S1. QseC activity is not enhanced in the presence of epinephrine.**

(A-B) Panels show radiographs that track autophosphorylation and subsequent phosphotransfer of  $^{32}\text{P}$ - $\gamma$ ATP to QseB by QseC in UTI89 membrane fractions in the absence (A) and presence (B) of epinephrine (Epi).  $N \geq 3$  biological replicates. (C) Representative quantification of phosphorylated QseB (QseB~P) in the presence (filled circle) or absence (open circle) of epinephrine using image J. (D) Representative qRT-PCR analysis tracking the relative fold change of *qseB* transcript in wild-type UTI89 (squares) and UTI89 $\Delta$ *qseC* (triangles) in the presence (filled shape) or absence (open shape) of epinephrine. Fold changes are graphed on a Log<sub>2</sub> scale.  $N=2$

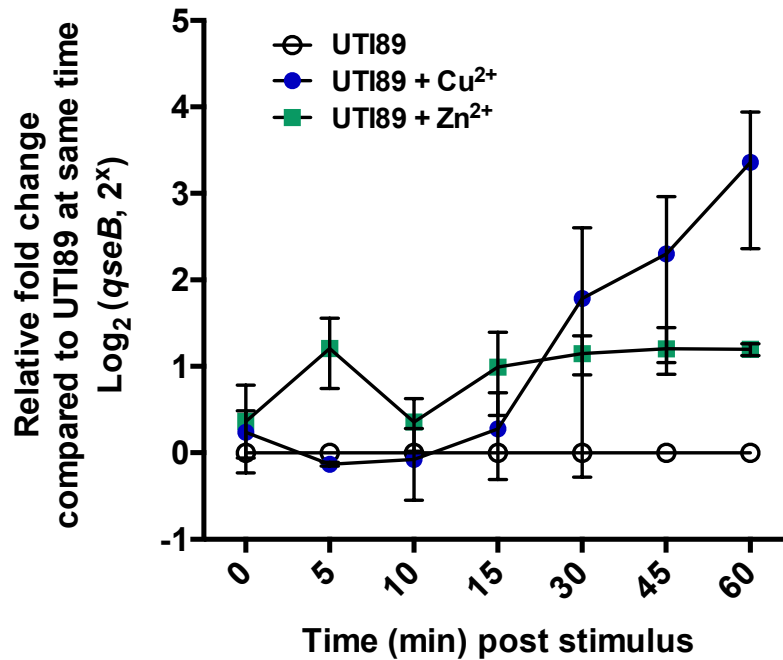

**Fig. S2. The *qseBC* transcriptional surge is specific to ferric iron.**

The graph depicts qRT-PCR analysis of *qseB* transcript abundance in UTI89 in N-minimal medium (open circles), UTI89 in the presence of copper (blue circles), and UTI89 in the presence of zinc (green squares). Fold changes were calculated using the  $\Delta\Delta\text{CT}$  method, where *rrsH* was used as an endogenous control and samples were normalized to matching time points of UTI89 in the absence of added metal cations. Fold changes are graphed on a  $\text{Log}_2$  scale. Error bars indicate standard error of the mean (SEM), N=3 biological replicates.

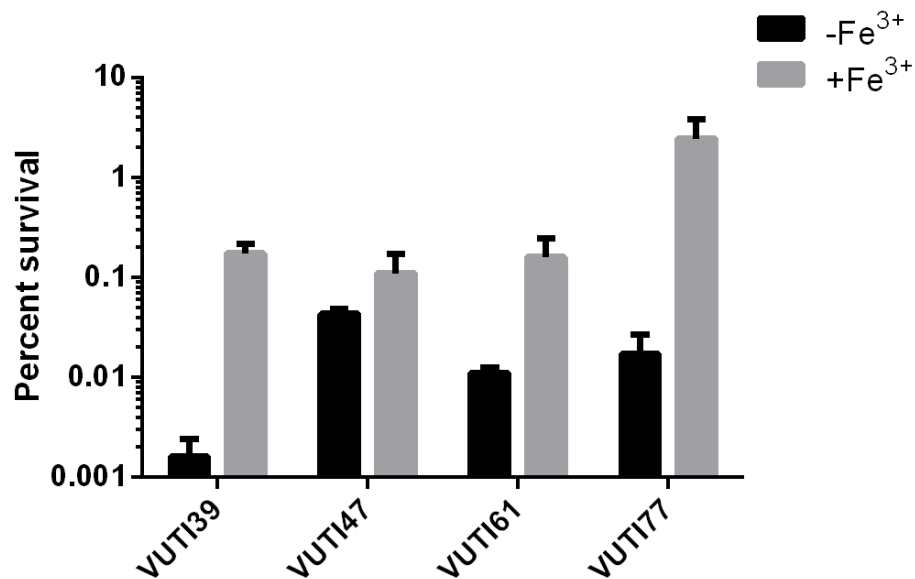

**Fig. S3. PMB tolerance after ferric iron preconditioning varies between clinical urinary isolates.**

The graph depicts tolerance of various clinically isolated *E. coli* strains to 2.5  $\mu\text{g/mL}$  polymyxin B with or without ferric iron preconditioning. “-Fe<sup>3+</sup>” indicates cells grown in N-minimal media without additional ferric iron before exposure to polymyxin B. “+Fe<sup>3+</sup>” indicates cells grown in N-minimal media with ferric iron before exposure to polymyxin B. Survival was calculated by dividing the number of colony forming units (CFUs) recovered after polymyxin B incubation by the number of CFUs recovered after incubation in PBS alone, and multiplying by 100. Error bars represent standard error of the mean (SEM), N=3 biological replicates.

**Table S1. QseB and QseC protein sequence identity among *E. coli* strains and other enteric bacteria.**

Clustal Omega was used to align and compare sequence. The percent identity was reported from the percent identity matrix following alignment.

| <b>Strain</b>                         | <b>QseB protein sequence identity (%)</b> | <b>GenBank accession number</b> | <b>QseC protein sequence identity (%)</b> | <b>GenBank accession number</b>          |
|---------------------------------------|-------------------------------------------|---------------------------------|-------------------------------------------|------------------------------------------|
| <i>E. coli</i>                        |                                           |                                 |                                           |                                          |
| <b>UPEC str. UTI89</b>                | 100                                       | ABE08897.1                      | 100                                       | ABE08898.1                               |
| <b>APEC O1K1 str. O1</b>              | 100.00                                    | ABJ02530.1                      | 100.00                                    | ABJ02531.1                               |
| <b>B2 phylogenetic group: O83:H1</b>  | 100.00                                    | YP_006121348.1                  | 98.89                                     | YP_006121349.1                           |
| <b>D1 phylogenetic group: UMN026</b>  | 100.00                                    | YP_002414171.1                  | 98.89                                     | YP_002414172.1                           |
| <b>D2 phylogenetic group: IAI39</b>   | 100.00                                    | YP_002409426.1                  | 98.22                                     | YP_002409427.1                           |
| <b>UPEC str. CFT073</b>               | 99.54                                     | AAN82208.1                      | 98.89                                     | AAN82209.1                               |
| <b>K12 str. MG1655</b>                | 99.54                                     | NP_417497.1                     | 98.89                                     | NP_417498.1                              |
| <b>B1 phylogenetic group: O104:H4</b> | 99.54                                     | AFS72693.1                      | 98.22                                     | AFS72692.1                               |
| <b>EAEC str. E55989</b>               | 99.54                                     | CAU99558.1                      | 98.22                                     | CAU99560.                                |
| <b>EHEC str. EDL933</b>               | 99.54                                     | AIG70396.1                      | 98.22                                     | AIG70397.1                               |
| <b>EPEC O55:H7 str. CB9615</b>        | 99.54                                     | ADD58237.1                      | 98.22                                     | ADD58238.1                               |
| <b>O157:H7 str. Sakai Sakai*</b>      | 99.54                                     | NP_311934.1                     | 97.13 / 98.55                             | NP_3909913-3910437<br>NP_3910431-3911261 |
| <b>ETEC O139:H28 str. E24377A</b>     | 99.07                                     | ABV19769.1                      | 98.22                                     | ABV17955.1                               |
| <b>Additional enteric bacteria</b>    |                                           |                                 |                                           |                                          |

|                                                          |        |             |       |             |
|----------------------------------------------------------|--------|-------------|-------|-------------|
| <i>Shigella sonnei</i> str.<br>Mosely                    | 100.00 | EJL13232.1  | 99.11 | EJL13233.1  |
| <i>Salmonella enterica</i><br>Typhumurium str.<br>LT2    | 87.67  | NP_462092.1 | 79.29 | NP_462093.1 |
| <i>Salmonella enterica</i><br>Typhumurium str.<br>14028S | 87.67  | ACY90252.1  | 79.29 | ACY90253.1  |
| <i>Klebsiella pneumoniae</i><br>str. 342                 | 83.11  | ACI08570.1  | 67.04 | ACI08526.1  |
| <i>Edwardsiella tarda</i>                                | 74.89  | ADO13165.1  | 56.35 | ADO24152.1  |

**\*Sakai has a stop codon in the middle of this putative QseC sequence rendering QseC non-functional in this strain.**

**Table S2. Bacterial strains.**

| Strain                                                                | Source                        |
|-----------------------------------------------------------------------|-------------------------------|
| UTI89                                                                 | Mulvey <i>et al.</i> (41)     |
| UTI89 $\Delta$ <i>qseC</i>                                            | Kostakioti <i>et al.</i> (24) |
| UTI89 $\Delta$ <i>pmrB</i>                                            | Guckes <i>et al.</i> (23)     |
| UTI89 $\Delta$ <i>qseB</i>                                            | Kostakioti <i>et al.</i> (24) |
| UTI89 $\Delta$ <i>pmrA</i>                                            | Guckes <i>et al.</i> (23)     |
| UTI89 $\Delta$ <i>pmrAB</i>                                           | Guckes <i>et al.</i> (23)     |
| UTI89 $\Delta$ <i>qseBC</i>                                           | Kostakioti <i>et al.</i> (24) |
| UTI89 $\Delta$ <i>qseB</i> $\Delta$ <i>pmrA</i>                       | This study                    |
| UTI89 $\Delta$ <i>qseC</i> $\Delta$ <i>pmrA</i>                       | Guckes <i>et al.</i> (23)     |
| UTI89 $\Delta$ <i>qseBC</i> $\Delta$ <i>pmrA</i>                      | This study                    |
| UTI89 $\Delta$ <i>phoPQ</i>                                           | This study                    |
| UTI89 $\Delta$ <i>qseC</i> $\Delta$ <i>pmrA</i> $\Delta$ <i>phoPQ</i> | This study                    |
| <i>Salmonella enterica</i> Typhimurium 14028                          | Mark Goulian                  |

**Table S3. Plasmids.**

| Plasmid           | Source |
|-------------------|--------|
| pTrc99A_pQseC     | (24)   |
| pTrc99A_pPmrB     | (24)   |
| pBADmycHisA_PmrA  | (23)   |
| pBADmycHisA_QseB  | (24)   |
| pBADMycHisA_PmrB  | (23)   |
| pBADmycHisA_QseC  | (23)   |
| Pqse:: <i>gfp</i> | (23)   |

**Table S4. Primers and probes.**

| Primer/Probe         | Nucleotide Sequence (5'→3') | Purpose |
|----------------------|-----------------------------|---------|
| rrsH483_Fwd          | CGTTACCCGCAGAAGAAGCAC       | qRT-PCR |
| rrsH637_Rev          | GATGCAGTTCCCAGGTTGAGC       | qRT-PCR |
| rrSH probe           | VIC-CGTTAATCGGAATTACTG      | qRT-PCR |
| <i>gfp</i> _qrt_Fwd  | GTGCCATGCCCCGAAGGTTATGTAC   | qRT-PCR |
| <i>gfp</i> _qrt_Rev  | GTTGTATTCCAATTTGTGTCCAAGAAT | qRT-PCR |
| <i>gfp</i> probe     | FAM-ACGTGCTGAAGTCAAG        | qRT-PCR |
| <i>gyrB</i> _qrt_Fwd | GATGCGCGTGAAGGCCTGATTG      | qRT-PCR |
| <i>gyrB</i> _qrt_Rev | CACGGGCACGGGCAGCATC         | qRT-PCR |
| <i>gyrB</i> probe    | VIC-ACGAACTGCTGGCGGA        | qRT-PCR |
| <i>yibD</i> _qrt_Fwd | GGTTCAACGGATAATTCTGTT       | qRT-PCR |
| <i>yibD</i> _qrt_Rev | ACTTCAATCCCACGATTACG        | qRT-PCR |
| <i>yibD</i> probe    | NED-CACGTTTCGTTTGTTCATC     | qRT-PCR |
